# Supplementary material for: Use of Multiple Machine Learning Approaches for Selecting Urothelial Cancer-Specific DNA Methylation Biomarkers in Urine
Source: MDPI journal article supplement (doi:10.3390/ijms25020738), 2024-01-06
Supplement: s1 [file s1]

# Use of multiple machine learning approaches for selecting Urothelial cancer specific DNA-methylation biomarkers in urine – Supplementary Material

## SUPPLEMENTARY TABLES

|                                | UCa<br>male | PCt<br>male | UCt<br>male | no Uca<br>male |
|--------------------------------|-------------|-------------|-------------|----------------|
| <b>n</b>                       | 251         | 40          | 71          | 111            |
| <b>Age in years median</b>     | 72          | 70.5        | 69          | 70             |
| <b>Age in years range</b>      | (35-92)     | (48-87)     | (41-86)     | (41-87)        |
| <b>Staging UCa</b>             |             |             |             |                |
| <b>Ta</b>                      | 128         |             |             |                |
| <b>T1</b>                      | 87          |             |             |                |
| <b>T2</b>                      | 27          |             |             |                |
| <b>Tis</b>                     | 16          |             |             |                |
| <b>N/A</b>                     | 3           |             |             |                |
| <b>Grading UCa (n)</b>         |             |             |             |                |
| <b>Low grade</b>               | 195         |             |             |                |
| <b>High grade</b>              | 53          |             |             |                |
| <b>N/A</b>                     | 3           |             |             |                |
| <b>Localization UCa</b>        |             |             |             |                |
| <b>Bladder</b>                 | 143         |             |             |                |
| <b>Ureter</b>                  | 6           |             |             |                |
| <b>Urethra</b>                 | 2           |             |             |                |
| <b>History of UCa (n)</b>      |             |             |             |                |
| <b>No</b>                      | 151         | 39          | 21          | 60             |
| <b>Yes</b>                     | 100         | 1           | 50          | 51             |
| <b>Leukocytes in urine (n)</b> |             |             |             |                |
| <b>0</b>                       | 161         | 33          | 42          | 75             |
| <b>25 Leu/μL</b>               | 67          | 4           | 22          | 26             |
| <b>100 Leu/μL</b>              | 46          | 3           | 14          | 17             |

**Table S1:** Patient and urine sample characteristics. The study population was stratified for history of urothelial carcinoma, tumor classification and urinary leukocyte counts. UCa=urothelial carcinoma; UCt=urological controls; PCt=population controls; Cis=carcinoma in situ.

| Description                                                               | Machine learning method | min | max                            | stepsize |
|---------------------------------------------------------------------------|-------------------------|-----|--------------------------------|----------|
| maximum depth of a tree                                                   | boosted trees           | 2   | 10                             | 2        |
| maximal number of boosting iterations                                     | boosted trees           | 1   | 20                             | 1        |
| number of candidate features considered in each branching within the tree | random forest           | 1   | $\text{floor}(\text{sqrt}(p))$ | 1        |

**Table S2.** Values considered for the hyperparameters.  $p$  = number of remaining features in this iteration; floor = rounding to the greatest integer less than or equal to the original number; sqrt = squareroot

| Amplicon and CpG | AUC     | threshold<br>at minimum 95% specificity | sensitivity at the threshold<br>with minimum 95% specificity | sensitivity at the threshold<br>with minimum 95% specificity |
|------------------|---------|-----------------------------------------|--------------------------------------------------------------|--------------------------------------------------------------|
| 02 CpG 1         | 0.80991 | 0.335                                   | 0.40239                                                      | 0.95495                                                      |
| 02 CpG 2         | 0.83299 | 0.445                                   | 0.54183                                                      | 0.95495                                                      |
| 02 CpG 3         | 0.83769 | 0.375                                   | 0.55378                                                      | 0.95495                                                      |
| 02 CpG 4         | 0.83028 | 0.445                                   | 0.54980                                                      | 0.95495                                                      |
| 02 CpG 6         | 0.84582 | 0.435                                   | 0.57769                                                      | 0.96396                                                      |
| 02 CpG 7         | 0.82775 | 0.295                                   | 0.50199                                                      | 0.95495                                                      |
| 02 CpG 8         | 0.83500 | 0.415                                   | 0.56972                                                      | 0.95495                                                      |
| 02 CpG 9.10      | 0.83432 | 0.345                                   | 0.53386                                                      | 0.95495                                                      |
| 02 CpG 11        | 0.80864 | 0.535                                   | 0.53386                                                      | 0.95495                                                      |
| 14 CpG 1         | 0.77709 | 0.485                                   | 0.47809                                                      | 0.95495                                                      |
| 14 CpG 2.3       | 0.79114 | 0.475                                   | 0.50996                                                      | 0.95495                                                      |
| 14 CpG 4.5       | 0.79685 | 0.435                                   | 0.48207                                                      | 0.95495                                                      |
| 14 CpG 6         | 0.79572 | 0.415                                   | 0.45418                                                      | 0.96396                                                      |
| 14 CpG 7.8.9     | 0.79857 | 0.395                                   | 0.51793                                                      | 0.95495                                                      |
| 14 CpG 10        | 0.80640 | 0.475                                   | 0.52191                                                      | 0.95495                                                      |
| 14 CpG 11.12     | 0.79965 | 0.445                                   | 0.53386                                                      | 0.95495                                                      |
| 14 CpG 13        | 0.79419 | 0.385                                   | 0.50199                                                      | 0.95495                                                      |
| 14 CpG 14        | 0.77869 | 0.425                                   | 0.45020                                                      | 0.95495                                                      |
| 22 CpG 2         | 0.79651 | 0.345                                   | 0.50598                                                      | 0.95495                                                      |
| 22 CpG 3         | 0.79602 | 0.375                                   | 0.50199                                                      | 0.95495                                                      |
| 22 CpG 4         | 0.77876 | 0.415                                   | 0.49402                                                      | 0.95495                                                      |
| 22 CpG 5         | 0.78244 | 0.475                                   | 0.47410                                                      | 0.95495                                                      |
| 22 CpG 8         | 0.78484 | 0.465                                   | 0.46614                                                      | 0.95495                                                      |
| 22 CpG 9         | 0.78303 | 0.47                                    | 0.47410                                                      | 0.96396                                                      |
| 35 CpG 2.3       | 0.85388 | 0.405                                   | 0.49801                                                      | 0.96396                                                      |
| 35 CpG 5         | 0.85018 | 0.375                                   | 0.49801                                                      | 0.95495                                                      |
| 35 CpG 7         | 0.84767 | 0.465                                   | 0.50199                                                      | 0.95495                                                      |
| 42 CpG 1         | 0.82682 | 0.445                                   | 0.50199                                                      | 0.96396                                                      |
| 42 CpG 2.3       | 0.81908 | 0.355                                   | 0.46215                                                      | 0.95495                                                      |
| 42 CpG 4.5       | 0.81691 | 0.365                                   | 0.43825                                                      | 0.96396                                                      |
| 42 CpG 6.7.8     | 0.81602 | 0.405                                   | 0.46215                                                      | 0.95495                                                      |
| 42 CpG 9         | 0.83123 | 0.435                                   | 0.49402                                                      | 0.95495                                                      |
| 42 CpG 10        | 0.81831 | 0.435                                   | 0.50199                                                      | 0.95495                                                      |
| 42 CpG 12        | 0.82434 | 0.475                                   | 0.49801                                                      | 0.96396                                                      |
| 64 CpG 1         | 0.79470 | 0.455                                   | 0.41833                                                      | 0.96396                                                      |
| 64 CpG 2         | 0.77910 | 0.465                                   | 0.41833                                                      | 0.96396                                                      |
| 64 CpG 3         | 0.80483 | 0.515                                   | 0.43825                                                      | 0.95495                                                      |
| 64 CpG 4         | 0.78549 | 0.465                                   | 0.41833                                                      | 0.95495                                                      |
| 64 CpG 5         | 0.78258 | 0.405                                   | 0.41434                                                      | 0.95495                                                      |
| 64 CpG 7.8       | 0.78482 | 0.745                                   | 0.39841                                                      | 0.95495                                                      |
| 70 CpG 3.4       | 0.79236 | 0.475                                   | 0.49004                                                      | 0.95495                                                      |
| 70 CpG 5         | 0.78692 | 0.505                                   | 0.46614                                                      | 0.95495                                                      |
| 70 CpG 6         | 0.80013 | 0.515                                   | 0.52590                                                      | 0.95495                                                      |
| 70 CpG 7         | 0.72858 | 0.545                                   | 0.38247                                                      | 0.95495                                                      |
| 70 CpG 9.10      | 0.80912 | 0.395                                   | 0.44223                                                      | 0.95495                                                      |
| 70 CpG 14        | 0.78310 | 0.395                                   | 0.41036                                                      | 0.95495                                                      |
| 71 CpG 1         | 0.75184 | 0.395                                   | 0.37052                                                      | 0.96396                                                      |
| 71 CpG 2         | 0.75182 | 0.435                                   | 0.33466                                                      | 0.96396                                                      |
| 71 CpG 3.4       | 0.75267 | 0.485                                   | 0.40637                                                      | 0.95495                                                      |
| 71 CpG 5         | 0.71803 | 0.465                                   | 0.33865                                                      | 0.95495                                                      |
| 71 CpG 6.7       | 0.76623 | 0.555                                   | 0.37052                                                      | 0.95495                                                      |
| 71 CpG 8.9.10    | 0.78712 | 0.535                                   | 0.49402                                                      | 0.95495                                                      |
| 71 CpG 11        | 0.79498 | 0.495                                   | 0.48606                                                      | 0.96396                                                      |
| 71 CpG 12        | 0.74611 | 0.525                                   | 0.37450                                                      | 0.95495                                                      |
| 74 CpG 3.4       | 0.82431 | 0.435                                   | 0.48207                                                      | 0.95495                                                      |
| 74 CpG 5         | 0.77743 | 0.315                                   | 0.34661                                                      | 0.95495                                                      |
| 74 CpG 6         | 0.81040 | 0.325                                   | 0.52191                                                      | 0.95495                                                      |
| 74 CpG 7         | 0.76338 | 0.365                                   | 0.33865                                                      | 0.95495                                                      |
| 74 CpG 8         | 0.80299 | 0.245                                   | 0.45817                                                      | 0.95495                                                      |
| 74 CpG 9         | 0.78863 | 0.265                                   | 0.43426                                                      | 0.95495                                                      |
| 74 CpG 10.11.12  | 0.82414 | 0.305                                   | 0.42231                                                      | 0.95495                                                      |
| 78 CpG 2.3       | 0.86009 | 0.555                                   | 0.43426                                                      | 0.95495                                                      |
| 78 CpG 6         | 0.83559 | 0.355                                   | 0.56972                                                      | 0.95495                                                      |
| 78 CpG 7.8       | 0.83823 | 0.395                                   | 0.49402                                                      | 0.95495                                                      |
| 78 CpG 12.13.14  | 0.83540 | 0.275                                   | 0.47410                                                      | 0.95495                                                      |

**Table S3:** AUCs as well as sensitivities and specificities referring to the threshold at minimum 95% specificity for the individual CpGs.

| Variable        | Gain        |
|-----------------|-------------|
| 35 CpG 2,3      | 10,66861304 |
| 35 CpG 7        | 10,61954113 |
| 78 CpG 2,3      | 9,731272295 |
| 35 CpG 5        | 9,320422225 |
| 02 CpG 6        | 8,912009401 |
| 71 CpG 11       | 7,830720814 |
| 02 CpG 3        | 7,721395808 |
| 71 CpG 8,9,10   | 7,669981896 |
| 14 CpG 7,8,9    | 7,6578913   |
| 70 CpG 3,4      | 7,657756872 |
| 02 CpG 8        | 7,269367192 |
| 14 CpG 2,3      | 7,211795598 |
| 02 CpG 2        | 6,940414613 |
| 78 CpG 12,13,14 | 6,939075511 |
| 42 CpG 10       | 6,550684244 |
| 14 CpG 6        | 6,530556086 |
| 02 CpG 9,10     | 6,501367669 |
| 14 CpG 1        | 6,460030774 |
| 14 CpG 10       | 6,382847978 |
| 71 CpG 6,7      | 6,36937089  |
| 14 CpG 13       | 6,330781662 |
| 71 CpG 3,4      | 6,323396691 |
| 42 CpG 9        | 6,277232649 |
| 71 CpG 12       | 6,270517276 |
| 71 CpG 5        | 6,187823415 |
| 02 CpG 4        | 6,061638874 |
| 74 CpG 8        | 6,040305118 |
| 70 CpG 6        | 5,814425711 |
| 42 CpG 6,7,8    | 5,739391334 |
| 42 CpG 4,5      | 5,625542884 |
| 78 CpG 7,8      | 5,580667898 |
| 70 CpG 5        | 5,538830509 |
| 14 CpG 4,5      | 5,379087331 |
| 70 CpG 9,10     | 5,303323403 |
| 02 CpG 1        | 5,239501335 |
| 42 CpG 1        | 5,075229702 |
| 42 CpG 12       | 5,051759574 |
| 02 CpG 11       | 5,043531967 |
| 74 CpG 10,11,12 | 5,01752708  |
| 78 CpG 6        | 4,917015972 |
| 14 CpG 11,12    | 4,884710782 |
| 02 CpG 7        | 4,845839163 |
| 14 CpG 14       | 4,83514427  |
| 71 CpG 2        | 4,717796786 |
| 70 CpG 7        | 4,468297992 |
| 74 CpG 6        | 4,363758733 |
| 64 CpG 3        | 4,098294378 |
| 74 CpG 3,4      | 3,970109515 |
| 74 CpG 9        | 2,017618288 |

**Table S4:** Variables and gains for the random forest accuracy analysis presented in the order of descending gains

| Variable        | Gain        |
|-----------------|-------------|
| 78 CpG 2,3      | 9,625572037 |
| 35 CpG 5        | 8,834559128 |
| 35 CpG 2,3      | 8,81596353  |
| 02 CpG 8        | 8,374873036 |
| 71 CpG 11       | 7,955909066 |
| 35 CpG 7        | 7,86994805  |
| 14 CpG 1        | 7,691645996 |
| 02 CpG 6        | 7,685204454 |
| 14 CpG 6        | 7,561897303 |
| 02 CpG 3        | 7,43457735  |
| 71 CpG 3,4      | 7,256460684 |
| 74 CpG 8        | 7,218894677 |
| 78 CpG 12,13,14 | 7,141516157 |
| 70 CpG 3,4      | 7,022778801 |
| 71 CpG 8,9,10   | 6,966229018 |
| 14 CpG 2,3      | 6,880071432 |
| 14 CpG 11,12    | 6,854446553 |
| 02 CpG 2        | 6,319375511 |
| 70 CpG 7        | 6,265230679 |
| 02 CpG 1        | 6,263411987 |
| 70 CpG 6        | 6,159510296 |
| 02 CpG 7        | 6,158493869 |
| 71 CpG 6,7      | 6,036166203 |
| 02 CpG 11       | 5,994626294 |
| 42 CpG 2,3      | 5,96984985  |
| 78 CpG 6        | 5,912002755 |
| 42 CpG 9        | 5,856165543 |
| 74 CpG 6        | 5,813733479 |
| 78 CpG 7,8      | 5,689455605 |
| 71 CpG 5        | 5,589377261 |
| 71 CpG 12       | 5,569047066 |
| 02 CpG 4        | 5,524074837 |
| 42 CpG 10       | 5,501817027 |
| 42 CpG 4,5      | 5,476061516 |
| 14 CpG 10       | 5,468554455 |
| 14 CpG 14       | 5,394757874 |
| 42 CpG 1        | 5,325541878 |
| 02 CpG 9,10     | 5,243466684 |
| 14 CpG 13       | 4,827112228 |
| 70 CpG 9,10     | 4,749427402 |
| 14 CpG 7,8,9    | 4,420146447 |
| 42 CpG 12       | 4,418998182 |
| 74 CpG 3,4      | 4,214448991 |

**Table S5:** Variables and gains for the random forest specificity analysis presented in the order of descending gains

| Variable        | Gain        |
|-----------------|-------------|
| 35 CpG 5        | 0.291474608 |
| 02 CpG 6        | 0.126829194 |
| 35 CpG 7        | 0.120671732 |
| 78 CpG 2,3      | 0.11326474  |
| 71 CpG 5        | 0.079259683 |
| 02 CpG 11       | 0.073051075 |
| 14 CpG 7,8,9    | 0.060040128 |
| 14 CpG 1        | 0.058205416 |
| 64 CpG 3        | 0.040574752 |
| 78 CpG 12,13,14 | 0.036628671 |

**Table S6:** Variables and gains for the boosted trees accuracy analysis presented in the order of descending gains

| Variable        | Gain        |
|-----------------|-------------|
| 35 CpG 5        | 0.29447613  |
| 35 CpG 7        | 0.237574358 |
| 78 CpG 2,3      | 0.194684897 |
| 02 CpG 6        | 0.086141723 |
| 78 CpG 12,13,14 | 0.044190993 |
| 14 CpG 1        | 0.025731423 |
| 74 CpG 9        | 0.023502392 |
| 14 CpG 6        | 0.023280829 |
| 71 CpG 8,9,10   | 0.022261492 |
| 71 CpG 3,4      | 0.019780189 |
| 02 CpG 7        | 0.016272253 |
| 71 CpG 11       | 0.006312997 |
| 71 CpG 5        | 0.005790323 |

**Table S7:** Variables and gains for the boosted trees specificity analysis presented in the order of descending gains

|                 | Boosted trees |             | Random Forest |             | LASSO |
|-----------------|---------------|-------------|---------------|-------------|-------|
|                 | accuracy      | specificity | accuracy      | specificity |       |
| 2_CpG_6         | X             | X           | X             | X           | X     |
| 35_CpG_7        | X             | X           | X             | X           | X     |
| 78_CpG_2.3      | X             | X           | X             | X           | X     |
| 14_CpG_1        | X             | X           | X             | X           |       |
| 71_CpG_5        | X             | X           | X             | X           |       |
| 35_CpG_5        | X             | X           | X             | X           |       |
| 78_CpG_12.13.14 | X             | X           | X             | X           |       |
| 42_CpG_9        |               |             | X             | X           | X     |
| 2_CpG_11        | X             |             | X             | X           |       |
| 14_CpG_7.8.9    | X             |             | X             | X           |       |
| 14_CpG_6        |               | X           | X             | X           |       |
| 71_CpG_11       |               | X           | X             | X           |       |
| 71_CpG_3.4      |               | X           | X             | X           |       |
| 71_CpG_8.9.10   |               | X           | X             | X           |       |
| 2_CpG_7         |               | X           | X             | X           |       |
| 2_CpG_1         |               |             | X             | X           |       |
| 2_CpG_2         |               |             | X             | X           |       |
| 2_CpG_3         |               |             | X             | X           |       |
| 2_CpG_4         |               |             | X             | X           |       |
| 2_CpG_8         |               |             | X             | X           |       |
| 2_CpG_9.10      |               |             | X             | X           |       |
| 14_CpG_10       |               |             | X             | X           |       |
| 14_CpG_11.12    |               |             | X             | X           |       |
| 14_CpG_13       |               |             | X             | X           |       |
| 14_CpG_14       |               |             | X             | X           |       |
| 14_CpG_2.3      |               |             | X             | X           |       |
| 35_CpG_2.3      |               |             | X             | X           |       |
| 42_CpG_1        |               |             | X             | X           |       |
| 42_CpG_10       |               |             | X             | X           |       |
| 42_CpG_12       |               |             | X             | X           |       |
| 42_CpG_4.5      |               |             | X             | X           |       |
| 64_CpG_3        | X             |             | X             |             |       |
| 64_CpG_4        | X             |             | X             |             |       |
| 70_CpG_3.4      |               |             | X             | X           |       |
| 70_CpG_6        |               |             | X             | X           |       |
| 70_CpG_7        |               |             | X             | X           |       |
| 70_CpG_9.10     |               |             | X             | X           |       |
| 71_CpG_12       |               |             | X             | X           |       |
| 71_CpG_6.7      |               |             | X             | X           |       |
| 74_CpG_3.4      |               |             | X             | X           |       |
| 74_CpG_6        |               |             | X             | X           |       |
| 74_CpG_8        |               |             | X             | X           |       |
| 74_CpG_9        |               | X           | X             |             |       |
| 78_CpG_6        |               |             | X             | X           |       |
| 78_CpG_7.8      |               |             | X             | X           |       |
| 14_CpG_4.5      |               |             | X             |             |       |
| 42_CpG_2.3      |               |             |               | X           |       |
| 42_CpG_6.7.8    |               |             | X             |             |       |
| 70_CpG_5        |               |             | X             |             |       |
| 71_CpG_2        |               |             | X             |             |       |
| 74_CpG_10.11.12 |               |             | X             |             |       |

**Table S8:** Selection of investigated sites with < 5% missings by the different indicated CpGs. Sites are ordered according to the number of approaches they were selected by, in descending order. Sites that were not chosen by any approach are not listed.

| Single CpG / CpG-unit or panel | sensitivity |            |
|--------------------------------|-------------|------------|
|                                | low grade   | high grade |

|                              |    |    |
|------------------------------|----|----|
| 02_CpG_6                     | 55 | 70 |
| 02_CpG_6;35_CpG_7            | 58 | 72 |
| 35_CpG_7                     | 51 | 49 |
| 78_CpG_2.3                   | 42 | 51 |
| 02_CpG_6;35_CpG_7;78_CpG_2.3 | 58 | 73 |
| 35_CpG_7;78_CpG_2.3          | 52 | 70 |

**Table S9:** Sensitivities for single CpGs / CpG-units or panels consisting of up to 3 candidate sites selected by RF, BT and LASSO in the UCa subsets of our dataset stratified for grading (n=195 low grade and 53 high grade cases)

## SUPPLEMENTARY FIGURES

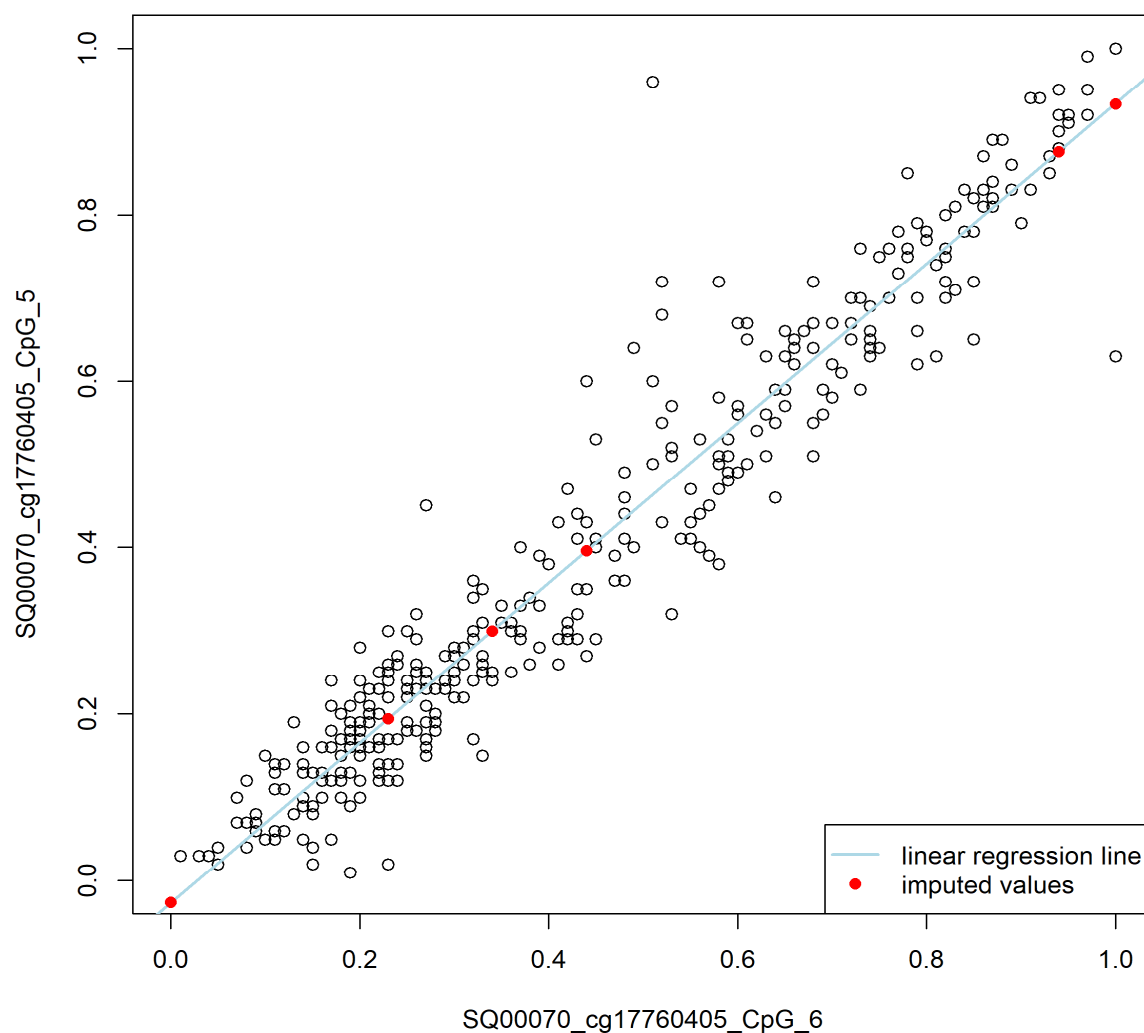

**Figure S1:** Scatterplot of two exemplarily chosen CpGs to illustrate the imputation method. CpG 70\_5 (y-axis) has some missing values. Within the same Amplicon, the CpG with the highest correlation is searched, which is CpG 70\_6 (x-axis).



## RFE: Feature number vs. accuracy

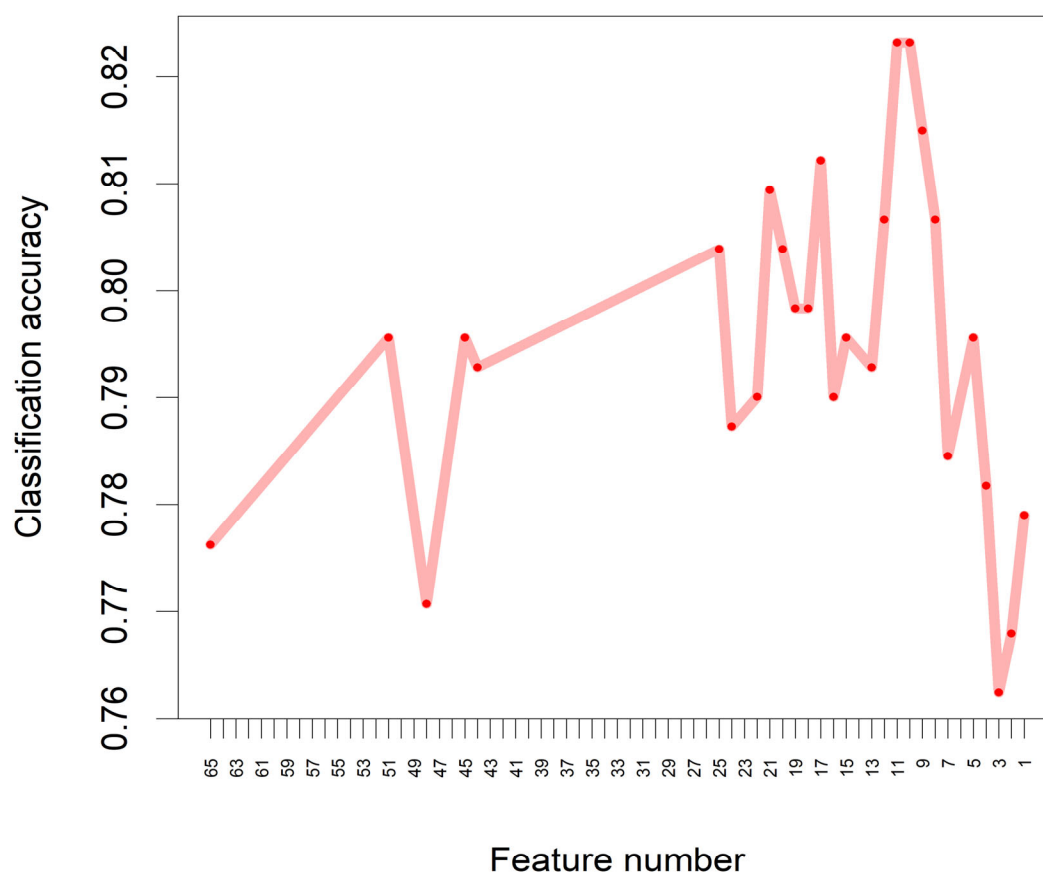

**Figure S2.** Plot of the achieved accuracy (y-axis) against the number of features in the respective biomarker panel (x-axis) in the boosted trees approach.

### xgb-RFE: Feature number vs. specificity

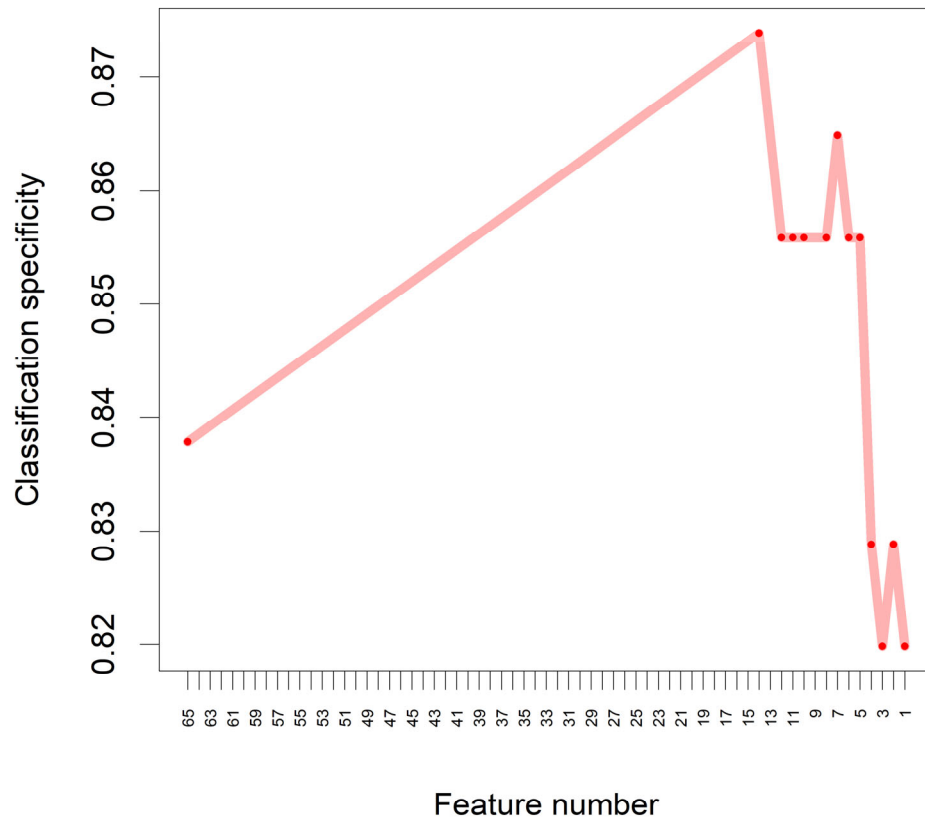

**Figure S3.** Plot of the achieved specificity (y-axis) against the number of features in the respective biomarker panel (x-axis) in the boosted trees approach.

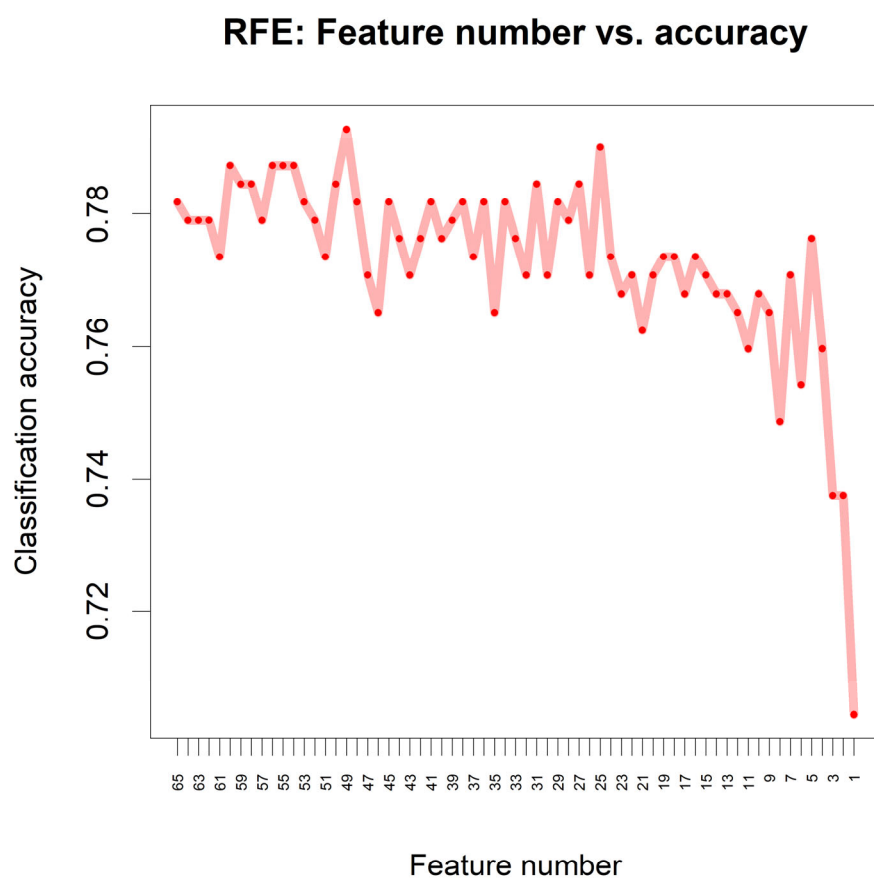

**Figure S4.** Plot of the achieved accuracy (y-axis) against the number of features in the respective biomarker panel (x-axis) in the random forest approach

### xgb-RFE: Feature number vs. specificity

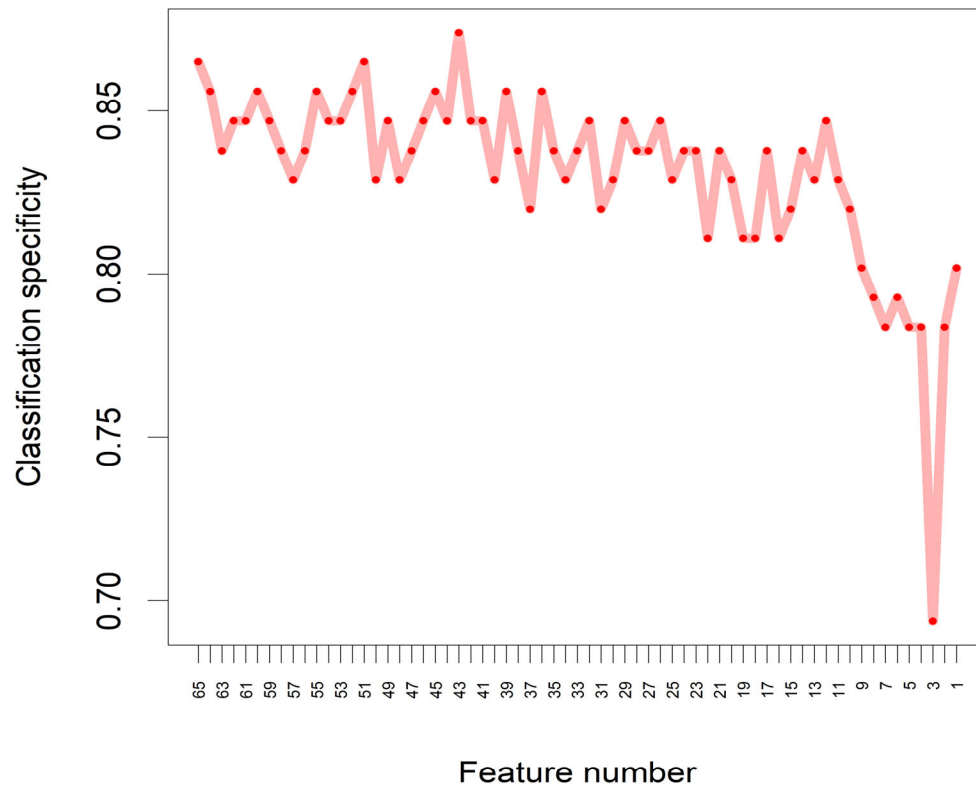

**Figure S5.** Plot of the achieved specificity (y-axis) against the number of features in the respective biomarker panel (x-axis) in the random forest approach.
